# Supplementary material for: Pyridostigmine Bromide Pills and Pesticides Exposure as Risk Factors for Eye Disease in Gulf War Veterans
Source: MDPI journal article supplement (doi:10.3390/jcm12062407), 2023-03-21
Supplement: s1 [file jcm-2229837-supplementary.pdf › jcm-2229837-supplementary.pdf]

**Supplementary Table S1.** OCT measurements grouped by exposure status.

| Mean±SD                                 | PB Pills<br>Exposed (n=44) | PB Pills Control<br>(n=62) | P-value | Pesticides<br>Exposed (n=44) | Pesticides<br>Control (n=62) | P-value |
|-----------------------------------------|----------------------------|----------------------------|---------|------------------------------|------------------------------|---------|
| <b>RNFL, <math>\mu\text{m}</math></b>   |                            |                            |         |                              |                              |         |
| <b>Right eye</b>                        |                            |                            |         |                              |                              |         |
| Signal strength                         | 0.9±0.2                    | 0.9±0.1                    | 0.78    | 0.9±0.1                      | 0.9±0.1                      | 0.33    |
| Superior                                | 115.8±18.9                 | 112.4±15.4                 | 0.32    | 115.0±17.4                   | 113.0±16.7                   | 0.55    |
| Nasal                                   | 75.4±12.9                  | 71.8±11.4                  | 0.14    | 71.9±11.6                    | 74.3±12.4                    | 0.31    |
| Inferior                                | 124.8±20.4                 | 119.5±20.4                 | 0.20    | 122.8±18.4                   | 120.9±22.0                   | 0.63    |
| Temporal                                | 64.8±13.6                  | 63.4±12.3                  | 0.58    | 63.6±11.1                    | 64.3±14.0                    | 0.77    |
| Average                                 | 95.3±12.6                  | 91.8±10.4                  | 0.12    | 93.4±10.0                    | 93.2±12.5                    | 0.92    |
| Average C/D                             | 0.5±0.2                    | 0.5±0.2                    | 0.85    | 0.5±0.1                      | 0.5±0.2                      | 0.44    |
| <b>Left eye</b>                         |                            |                            |         |                              |                              |         |
| Signal strength                         | 0.9±0.1                    | 0.9±0.1                    | 0.98    | 0.9±0.1                      | 0.9±0.1                      | 0.52    |
| Superior                                | 122.0±18.3                 | 115.7±22.5                 | 0.13    | 119.3±16.6                   | 117.6±23.7                   | 0.68    |
| Nasal                                   | 73.0±13.3                  | 70.4±11.8                  | 0.29    | 69.7±11.8                    | 72.7±12/8                    | 0.22    |
| Inferior                                | 125.1±21.2                 | 118.0±18.8                 | 0.07†   | 122.5±21.2                   | 119.9±19.3                   | 0.53    |
| Temporal                                | 65.2±21.5                  | 59.6±11.7                  | 0.09†   | 65.3±21.2                    | 59.5±12.1                    | 0.08    |
| Average                                 | 95.2±12.1                  | 91.4±11.0                  | 0.10    | 93.1±10.5                    | 92.9±12.4                    | 0.94    |
| Average C/D                             | 0.5±0.2                    | 0.5±0.2                    | 0.86    | 0.5±0.2                      | 0.5±0.2                      | 0.48    |
| <b>Macula, <math>\mu\text{m}</math></b> |                            |                            |         |                              |                              |         |
| <b>Right eye</b>                        |                            |                            |         |                              |                              |         |
| Signal strength                         | 0.9±0.1                    | 0.9±0.1                    | 0.75    | 0.9±0.1                      | 0.9±0.1                      | 0.88    |
| Central                                 | 264.1±19.3                 | 258.1±28.1                 | 0.23    | 257.9±25.0                   | 262.5±24.8                   | 0.35    |
| Inner superior                          | 325.6±16.1                 | 320.5±17.2                 | 0.13    | 321.0±15.4                   | 323.8±17.8                   | 0.40    |
| Outer superior                          | 280.1±15.2                 | 276.1±15.1                 | 0.19    | 275.2±11.8                   | 279.6±17.0                   | 0.14    |
| Inner nasal                             | 329.0±17.3                 | 322.2±18.5                 | 0.06†   | 325.0±18.3                   | 325.1±18.3                   | 0.98    |
| Outer nasal                             | 297.2±20.4                 | 293.0±20.2                 | 0.31    | 291.9±17.2                   | 296.8±17.2                   | 0.22    |
| Inner inferior                          | 322.4±15.5                 | 316.3±17.1                 | 0.06†   | 318.0±15.3                   | 319.5±17.6                   | 0.64    |
| Outer inferior                          | 269.1±15.0                 | 263.9±15.1                 | 0.08†   | 264.6±13.1                   | 267.0±16.5                   | 0.42    |
| Inner temporal                          | 313.7±14.5                 | 309.5±16.9                 | 0.18    | 311.3±15.9                   | 311.2±16.3                   | 0.96    |
| Outer temporal                          | 262.9±19.4                 | 262.2±13.9                 | 0.84    | 261.8±12.0                   | 263.0±18.9                   | 0.70    |
| <b>Left eye</b>                         |                            |                            |         |                              |                              |         |
| Signal strength                         | 0.9±0.1                    | 0.9±0.1                    | 0.83    | 0.9±0.1                      | 0.9±0.1                      | 0.59    |
| Central                                 | 265.7±30.4                 | 258.7±32.8                 | 0.27    | 263.9±33.2                   | 260.0±31.0                   | 0.53    |
| Inner superior                          | 325.2±17.0                 | 321.6±19.3                 | 0.33    | 322.8±14.8                   | 323.2±20.7                   | 0.91    |
| Outer superior                          | 279.8±15.4                 | 276.0±15.4                 | 0.21    | 276.4±12.0                   | 278.4±17.5                   | 0.51    |
| Inner nasal                             | 326.1±17.6                 | 324.0±20.4                 | 0.57    | 325.8±16.7                   | 324.2±20.9                   | 0.69    |
| Outer nasal                             | 295.3±19.4                 | 293.3±18.1                 | 0.59    | 293.8±13.6                   | 294.3±21.5                   | 0.87    |
| Inner inferior                          | 319.8±16.5                 | 316.6±19.7                 | 0.38    | 317.6±16.4                   | 318.2±19.8                   | 0.88    |
| Outer inferior                          | 270.4±17.4                 | 264.9±15.6                 | 0.09†   | 267.2±16.2                   | 267.2±16.9                   | 0.996   |
| Inner temporal                          | 313.1±15.2                 | 308.7±18.7                 | 0.21    | 310.2±15.6                   | 310.8±18.6                   | 0.87    |
| Outer temporal                          | 268.5±22.2                 | 260.6±14.5                 | 0.03*†  | 262.1±17.8                   | 265.2±18.8                   | 0.39    |
| <b>GCL, <math>\mu\text{m}</math></b>    |                            |                            |         |                              |                              |         |
| <b>Right eye</b>                        |                            |                            |         |                              |                              |         |
| Superior                                | 82.6±7.2                   | 79.3±12.0                  | 0.12    | 81.4±7.1                     | 80.1±12.3                    | 0.53    |
| Superior nasal                          | 83.5±8.6                   | 79.0±14.6                  | 0.07    | 82.3±7.9                     | 79.8±15.1                    | 0.34    |
| Inferior nasal                          | 81.9±8.7                   | 78.7±10.5                  | 0.10    | 81.4±7.6                     | 79.1±11.2                    | 0.24    |
| Inferior                                | 79.9±8.9                   | 77.0±10.9                  | 0.14    | 79.9±6.8                     | 77.0±11.9                    | 0.16    |
| Inferior temporal                       | 82.7±7.0                   | 79.7±10.0                  | 0.09    | 82.2±7.0                     | 80.0±10.1                    | 0.24    |
| Superior temporal                       | 81.1±7.0                   | 78.2±10.0                  | 0.11    | 80.0±6.7                     | 79.0±10.3                    | 0.55    |

|                           |           |           |      |           |           |      |
|---------------------------|-----------|-----------|------|-----------|-----------|------|
| Average GCL+IPL thickness | 82.0±7.3  | 78.8±10.5 | 0.09 | 81.2±6.6  | 79.4±11.0 | 0.34 |
| <b>Left eye</b>           |           |           |      |           |           |      |
| Superior                  | 81.6±11.2 | 81.0±8.9  | 0.78 | 81.0±10.6 | 81.5±9.5  | 0.83 |
| Superior nasal            | 80.5±16.4 | 81.6±10.4 | 0.67 | 82.2±9.0  | 80.3±15.6 | 0.47 |
| Inferior nasal            | 80.0±12.9 | 79.7±10.0 | 0.92 | 80.5±9.1  | 79.3±12.7 | 0.59 |
| Inferior                  | 79.0±10.0 | 77.5±10.0 | 0.45 | 78.7±7.2  | 77.8±11.6 | 0.65 |
| Inferior temporal         | 81.4±7.7  | 79.6±9.2  | 0.28 | 80.8±7.0  | 80.1±9.7  | 0.69 |
| Superior temporal         | 81.2±7.5  | 79.3±8.2  | 0.22 | 80.2±6.9  | 80.0±8.6  | 0.91 |
| Average GCL+IPL thickness | 80.8±9.2  | 79.9±8.9  | 0.57 | 80.6±7.3  | 80.0±10.1 | 0.77 |

RNFL: retinal nerve fiber layer, PB: pyridostigmine bromide; C/D: cup-to-disc ratio; GCL: ganglion cell layer, IPL: inner plexiform layer

\*Statistically significant difference at *P* value <0.05

†*P* value<0.01 and further analyzed as thinnest and thickest value of either eye
